# Supplementary material
Source: Springer Nature journal article supplement (https://www.springermedizin.de/resource/supplementary/12974_2011_468_MOESM8_ESM.pdf/9601376)

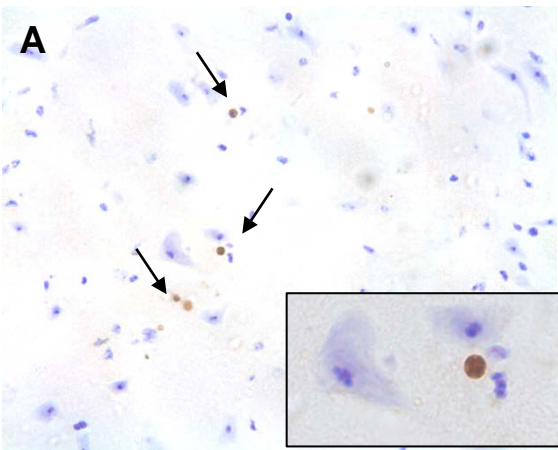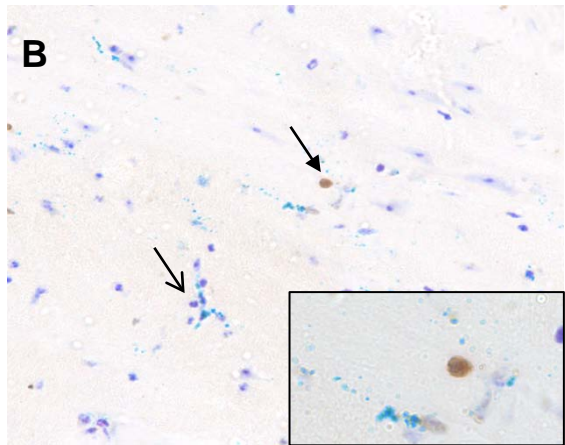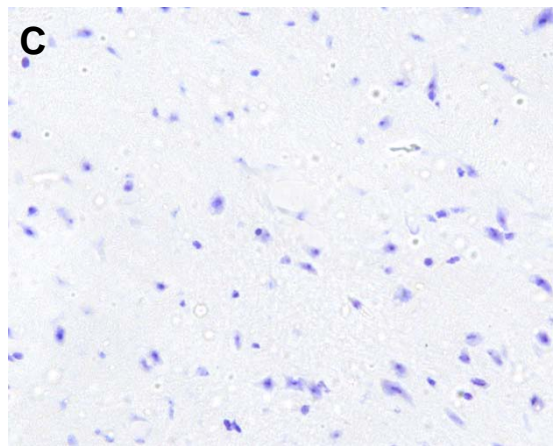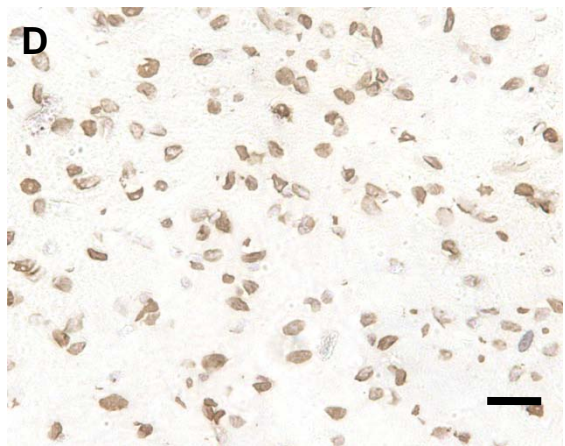

Supplement: MOESM8 [file 9601376]
